# Supplementary material for: Characteristics and Prognosis in Women and Men With Type 1 Diabetes Undergoing Coronary Angiography: A Nationwide Registry Report
Source: Oxford University Press journal article supplement (doi:10.2337/dc17-2352), 2018-02-20

SUPPLEMENTARY DATA

**Supplementary Table 1.** Distribution of coronary disease by diabetes status. Despite being substantial younger, women with type 1 diabetes more often had extensive three-vessel disease than women without diabetes (28% vs. 21%).

|               | Women<br>Type 1 DM | Men<br>Type 1 DM | Women<br>No DM | Men<br>No DM |
|---------------|--------------------|------------------|----------------|--------------|
| N             | 1155               | 1621             | 49 951         | 113 657      |
| Mean age (SD) | 57.5 (11.0)        | 57.6 (10.8)      | 68.1 (10.5)    | 65.8 (10.0)  |
| No stenosis   | 23 %               | 19 %             | 22%            | 12%          |
| 1-vessel      | 23%                | 23%              | 27%            | 25%          |
| 2-vessel      | 19%                | 18%              | 23%            | 26%          |
| 3-vessel      | 28%                | 30%              | 21%            | 28%          |
| Left main     | 7%                 | 10%              | 7%             | 9%           |
| 2 + 3-vessel  | 47%                | 48%              | 44%            | 54%          |

**Supplementary Table 2.** Variables associated with mortality for women and men (HR, 95% CI).

|                              | Women |              | Men   |              |
|------------------------------|-------|--------------|-------|--------------|
|                              | HR    | (95% CI)     | HR    | (95% CI)     |
| Age (10 years)               | 1.60  | (1.39-1.85)  | 1.41  | (1.25-1.59)  |
| BMI                          | 0.98  | (0.95-1.01)  | 1.004 | (0.98-1.03)  |
| Smoking                      | 1.36  | (0.95-1.96)  | 1.39  | (0.99-1.94)  |
| Diabetes duration (10 years) | 1.13  | (1.004-1.27) | 1.08  | (0.99-1.19)  |
| Peripheral artery disease    | 1.53  | (1.16-2.03)  | 1.75  | (1.39-2.12)  |
| Previous heart failure       | 1.44  | (1.06-1.96)  | 1.90  | (1.50-2.41)  |
| Previous renal failure       | 1.89  | (1.25-2.85)  | 2.61  | (1.89-3.60)  |
| Previous stroke              | 1.81  | (1.26-2.59)  | 1.56  | (1.17-2.09)  |
| Hypertension (treated)       | 0.79  | (0.52-1.209) | 0.79  | (0.54-1.15)  |
| Hyperlipidemia (treated)     | 0.98  | (0.72-1.33)  | 1.24  | (0.96-1.60)  |
| HbA1c                        | 1.01  | (1.002-1.02) | 1.005 | (0.997-1.01) |
| Stable CAD*                  | 1.31  | (0.96-1.79)  | 1.52  | (1.18-1.97)  |
| NSTE-ACS <sup>†</sup>        | 2.22  | (1.33-3.71)  | 1.87  | (1.26-2.77)  |
| STEMI <sup>‡</sup>           | 1.80  | (1.17-2.77)  | 1.59  | (1.15-2.21)  |

\*Coronary artery disease. <sup>†</sup>Non-ST-elevation acute coronary syndrome. <sup>‡</sup>ST-elevation myocardial infarction.

SUPPLEMENTARY DATA

**Supplementary Figure 1.** Percentage of coronary artery disease findings on coronary angiogram by gender.

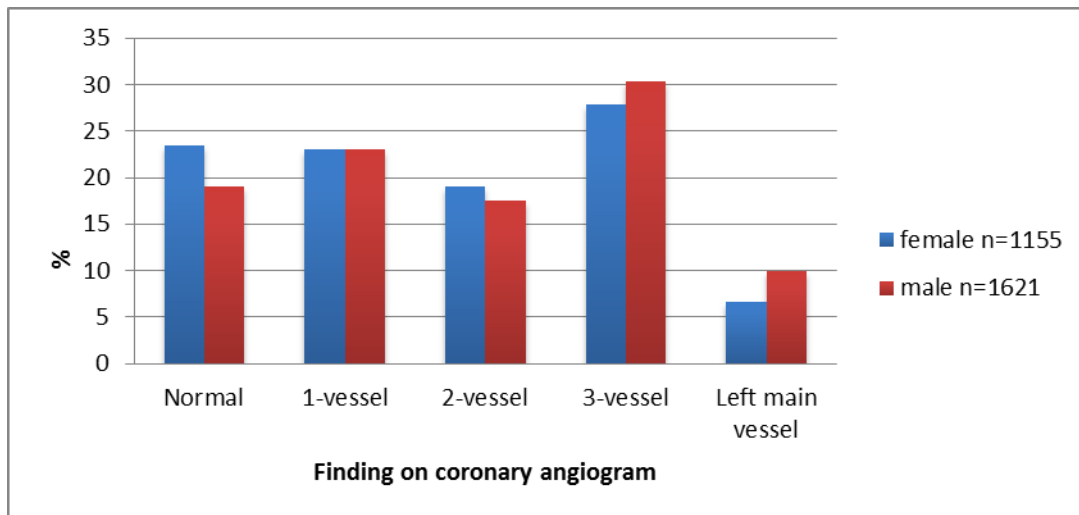

**Supplementary Figure 2.** Time to all-cause mortality after the coronary angiography (crude mortality) in women and men.

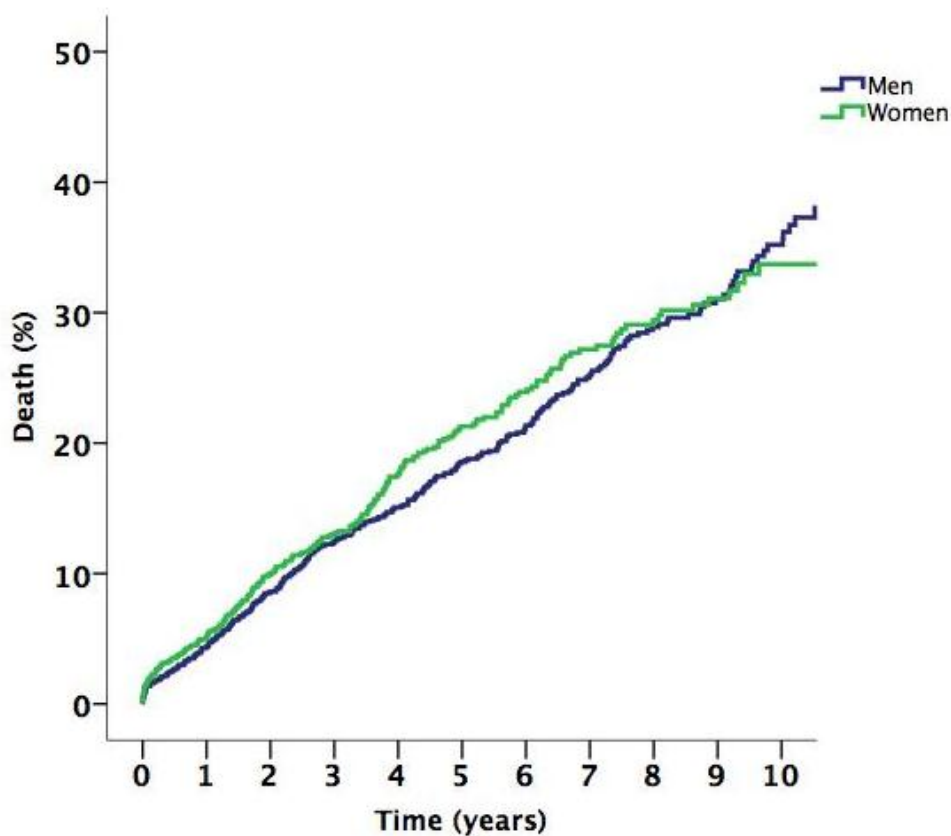

SUPPLEMENTARY DATA

**Supplementary Figure 3.** Mortality causes in (a) women and (b) men with associated ICD codes. Infection (ICD A00-B99), Cancer (ICD C00-D48), Endocrine or methabolic (ICD E00-E90), Urinary tract (ICD N00-N99), Respiration (ICD J00-J99), Gastrointestinal (ICD K00-K93), Ischemic heart disease (ICD I20-I25), Valvular disease (ICD I33-I39), Arrhythmia or heart Block (ICD I44-I49), Other cardiovascular (ICD I00-I15, I26-I28, I40-I43, I51.0-I51.9), Heart failure (ICD I50.0-I50.9), Cerebrovascular disease (ICD I60-I79), Other (ICD D50-D89, F00-F99, G00-G99, H00-H59, I30-I32, L00-L99, M00-M99, O00-O99, P00-P96, Q00-Q99, R00-R99, V01-X99, Z00-Z99).

**A.**

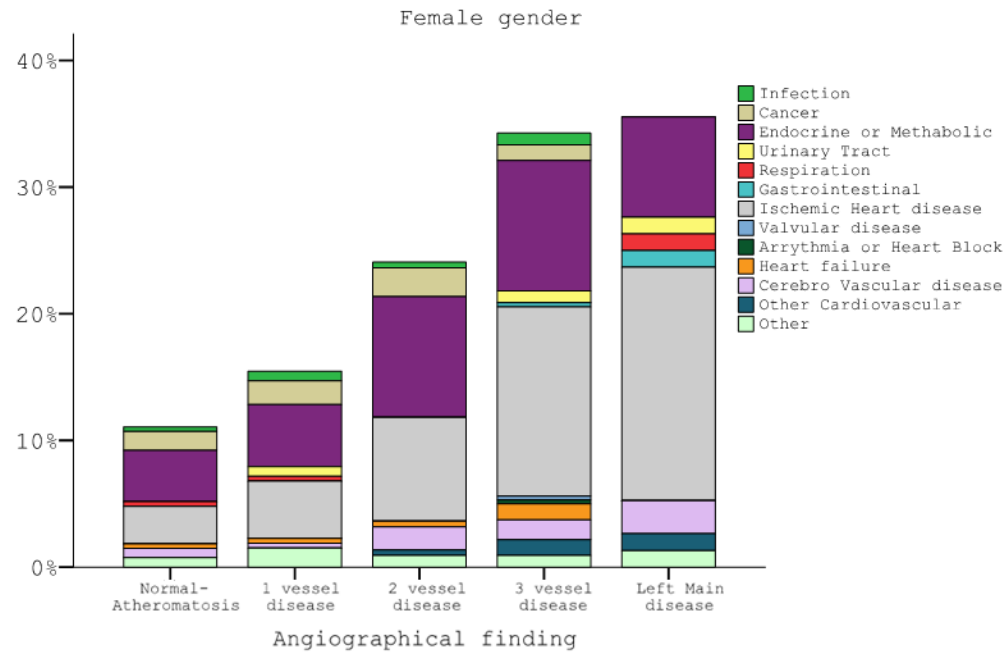

**B.**

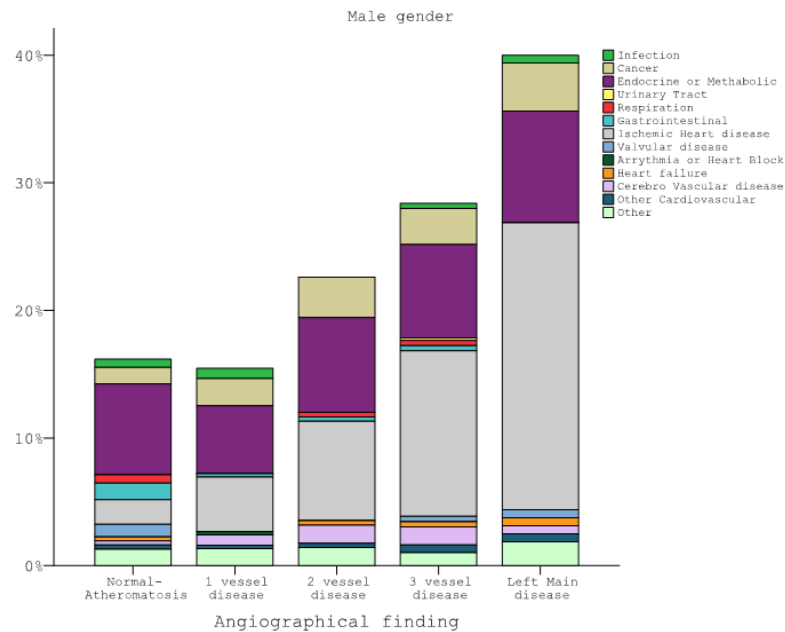

Supplement: dc172352supplementarydata.pdf [file dc172352supplementarydata.pdf]
